# Supplementary material for: Specific c-Jun N-Terminal Kinase Inhibitor, JNK-IN-8 Suppresses Mesenchymal Profile of PTX-Resistant MCF-7 Cells through Modulating PI3K/Akt, MAPK and Wnt Signaling Pathways
Source: PubMed Central journal article supplement (PMC7599514; doi:10.3390/biology9100320), 2020-10-01
Supplement: biology-09-00320-s001.pdf [file biology-09-00320-s001.pdf]

# Specific c-Jun N-Terminal Kinase Inhibitor, JNK-IN-8 Suppresses Mesenchymal Profile of PTX-Resistant MCF-7 Cells through Modulating PI3K/Akt, MAPK and Wnt Signaling Pathways

Pelin Ozfiliz-Kilbas, Ozlem Sonmez, Pinar Uysal-Onganer, Ajda Coker-Gurkan, Pinar Obakan-Yerlikaya and Elif Damla Arisan

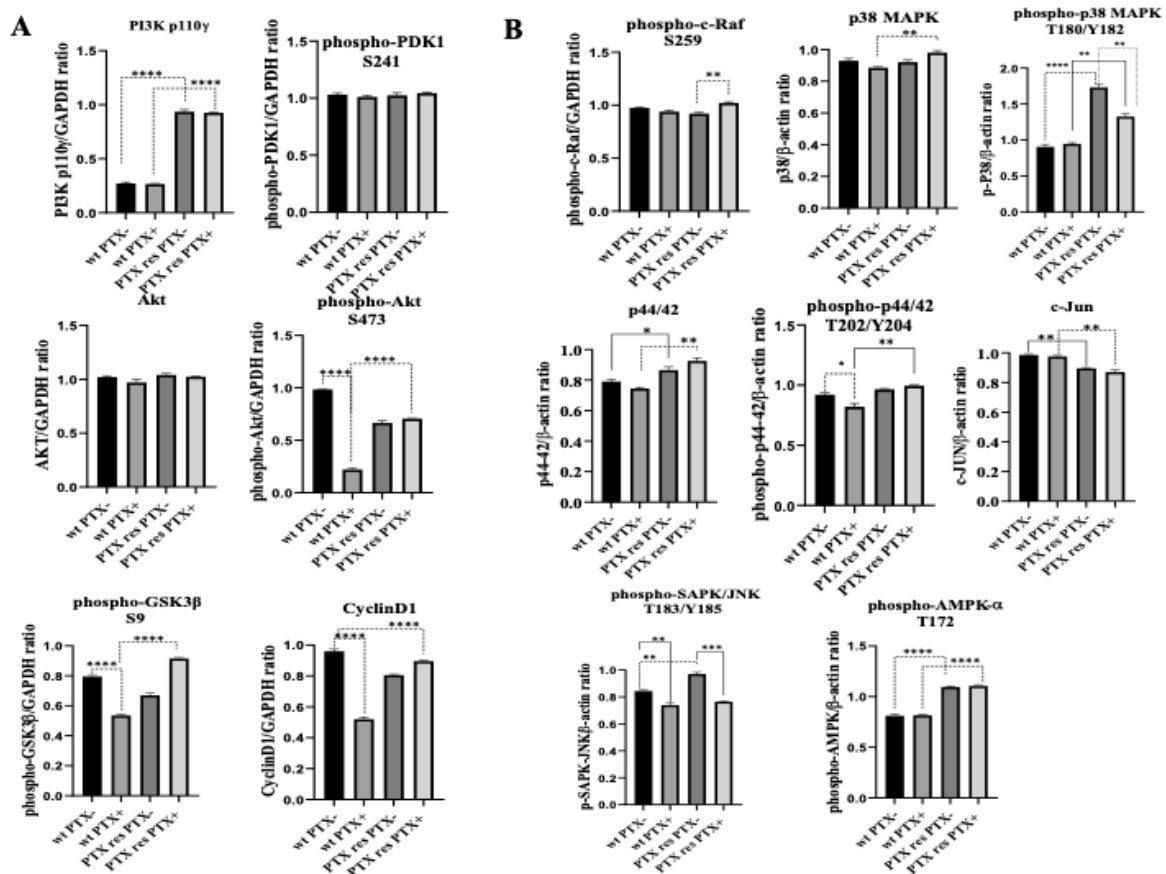

**Figure S1.** Densitometry analysis of PI3K/Akt (A) and MAPK (B) pathway members demonstrated in Figure 3. Statistically significant values considered as following: A) PI3K, phospho-Akt S473, phospho- GSK3 $\beta$  S9 and Cyclin D1 \*\*\*\*  $p < 0.0001$ . B) phospho-c-RAF \*\*  $p = 0.0049$ , p38 \*\*  $p = 0.0060$ , phospho-p38 \*\*  $p = 0.0013$ , p44/42 \*  $p = 0.0381$ , phospho-p44/42 \*  $p = 0.0130$ , \*\*  $p = 0.0016$ , c-Jun \*\*  $p = 0.0023$  phospho-SAPK/JNK \*\*  $p = 0.0013$ , phospho-AMPK- $\alpha$  T172 \*\*\*\*  $p < 0.0001$ .

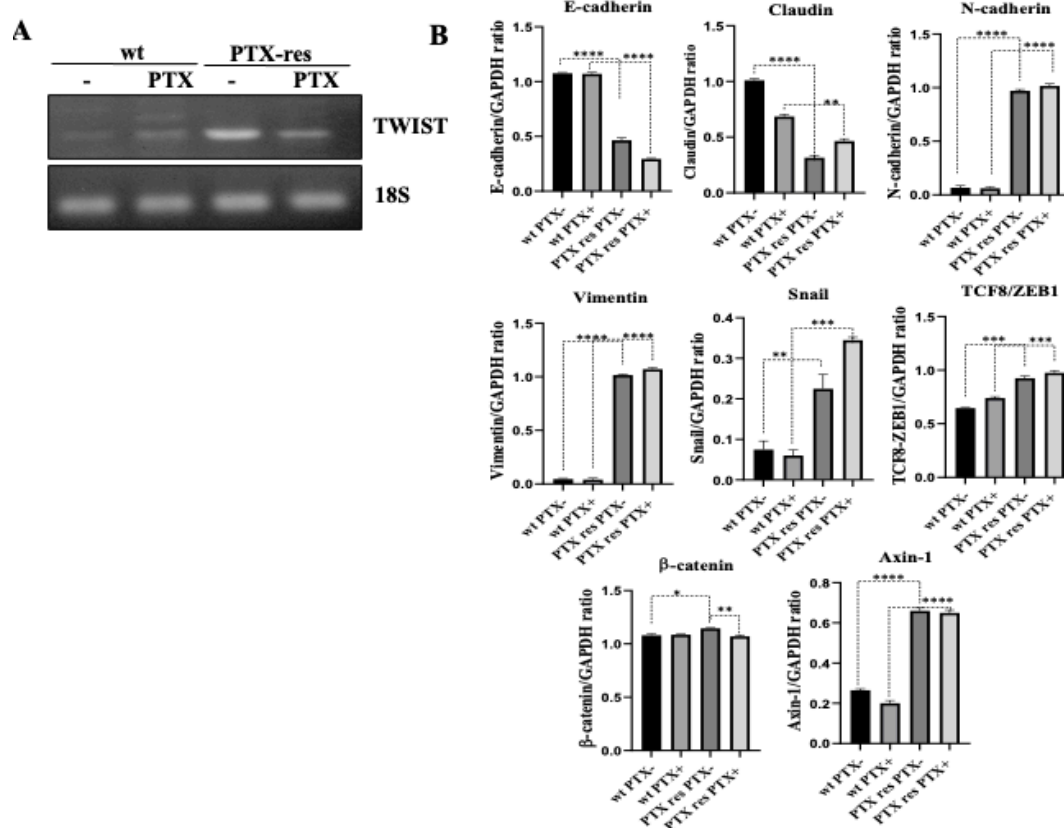

**Figure S2.** (A) The mRNA expression levels of Twist in wt and PTX-res cells determined by RT-PCR. 18S was used as a loading control. (B) Densitometry analysis of EMT pathway members demonstrated in Figure 4. Statistically significant values considered as following: E-cadherin \*\*\*\*  $p < 0.0001$ , Claudin \*\*  $p = 0.0013$ , \*\*\*  $p < 0.0001$ , N-cadherin and Vimentin \*\*\*\*  $p < 0.0001$ , Snail \*\*  $p = 0.0084$ , \*\*\*  $p = 0.0007$ , TCF8/ZEB1 \*\*\*  $p = 0.0003$ , β-catenin \*  $p = 0.0088$ , Axin-1\*\*\*\*  $p < 0.0001$ .

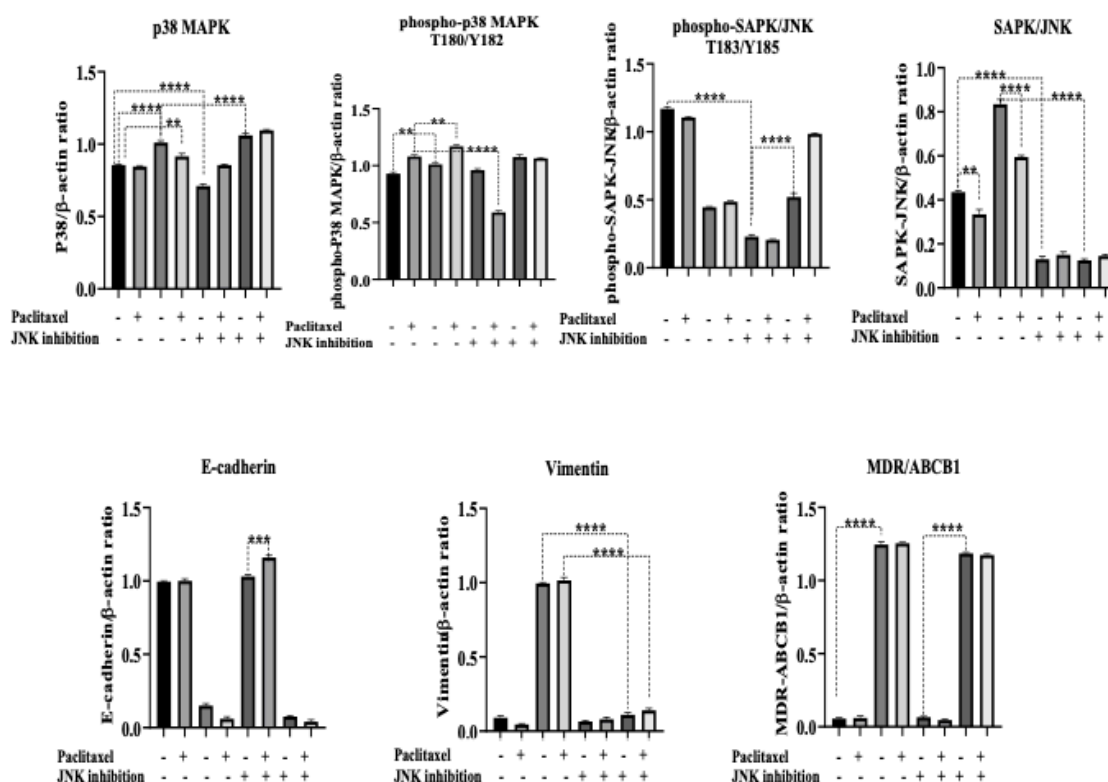

**Figure S3.** Densitometry analysis of p38, phospho-p38, SAPK/JNK, phospho-SAPK/JNK, E-cadherin, Vimentin, and MDR/ABC1 expressions demonstrated in Figure 5. Statistically significant values considered as following: p38 \*\*\*\*  $p < 0.0001$ , \*\*  $p = 0.0036$ , phospho-p38-MAPK Thr180/Tyr182 \*\*  $p = 0.0079$ , \*\*\*\*  $p < 0.0001$ , phospho-SAPK/JNK, SAPK/JNK \*\*\*\*  $p < 0.0001$ , E-cadherin \*\*\*  $p = 0.0001$ , Vimentin and MDR/ABC1 \*\*\*\*  $p < 0.0001$ .

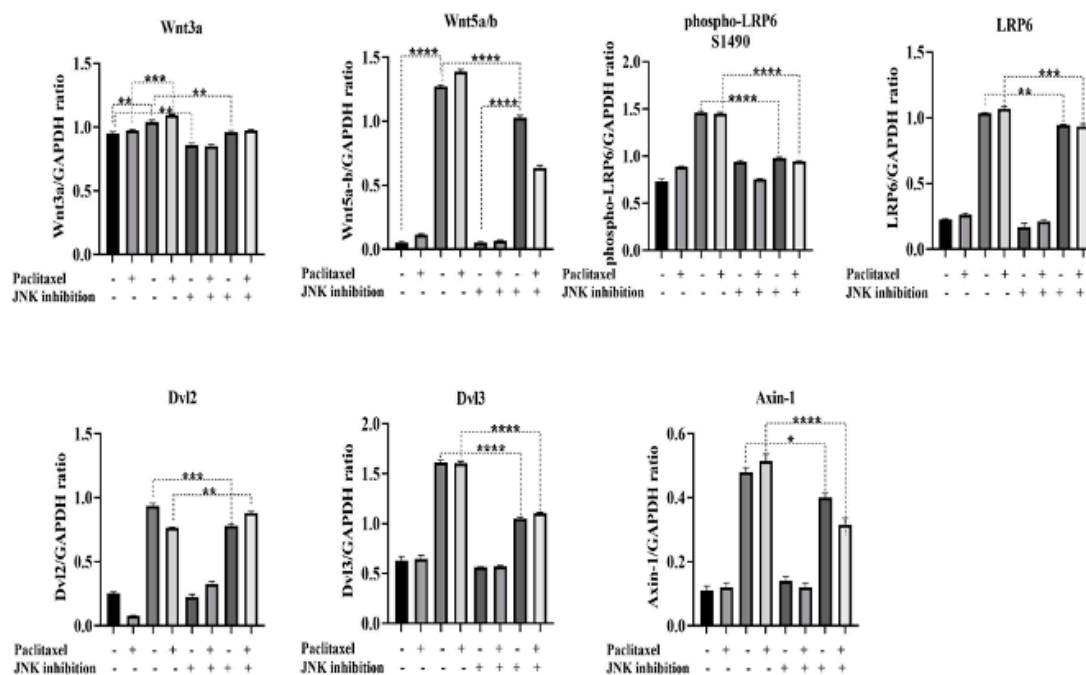

**Figure S4.** Densitometry analysis of Wnt signaling members demonstrated in Figure 6. Statistically significant values considered as following: Wnt3a \*\*  $p = 0.0010$ , \*\*\*  $p = 0.0001$ , Wn5a/b, phospho- LRP6 Ser1490 \*\*\*\*  $p < 0.0001$ , LRP6 \*\*  $p = 0.0063$ , \*\*\*  $p = 0.0004$ , Dvl2 \*\*  $p = 0.0014$ , \*\*\*  $p = 0.0002$ , Dvl3 \*\*\*\*  $p < 0.0001$ , Axin1 \*\*\*\*  $p < 0.0001$ , \*  $p = 0.0150$ .

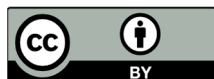

© 2020 by the authors. Licensee MDPI, Basel, Switzerland. This article is an open access article distributed under the terms and conditions of the Creative Commons Attribution (CC BY) license (<http://creativecommons.org/licenses/by/4.0/>).
